# Supplementary material
Source: MDPI journal article supplement (https://www.mdpi.com/2673-3986/4/4/44)

Supplemental Figure S1: Decision tree model depicting how prevalent cases of emphysema were determined at baseline, combining self-reporting, chest X-ray findings, and spirometry results.

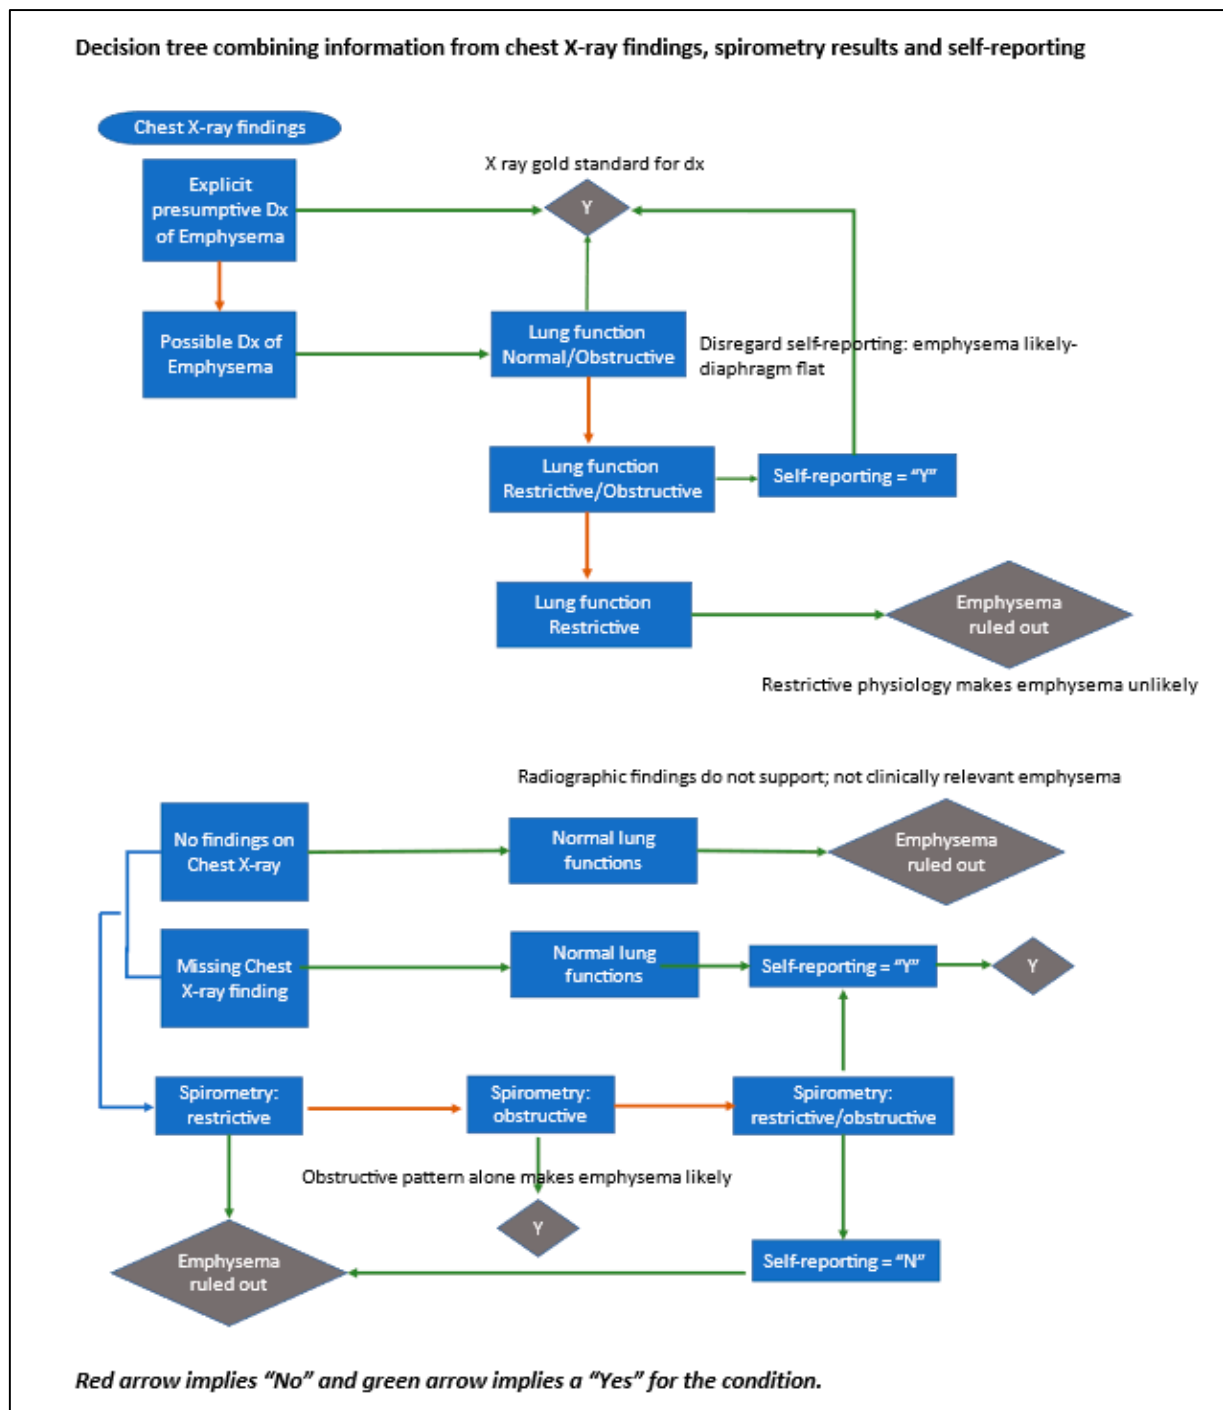

Supplement: s1 [file s1]
